# Supplementary figures and images for: The changing clinical profile of celiac disease: a 15-year experience (1998-2012) in an Italian referral center
Source: Springer Nature journal article supplement (doi:10.1186/s12876-014-0194-x), 2014-11-17

Figure 4

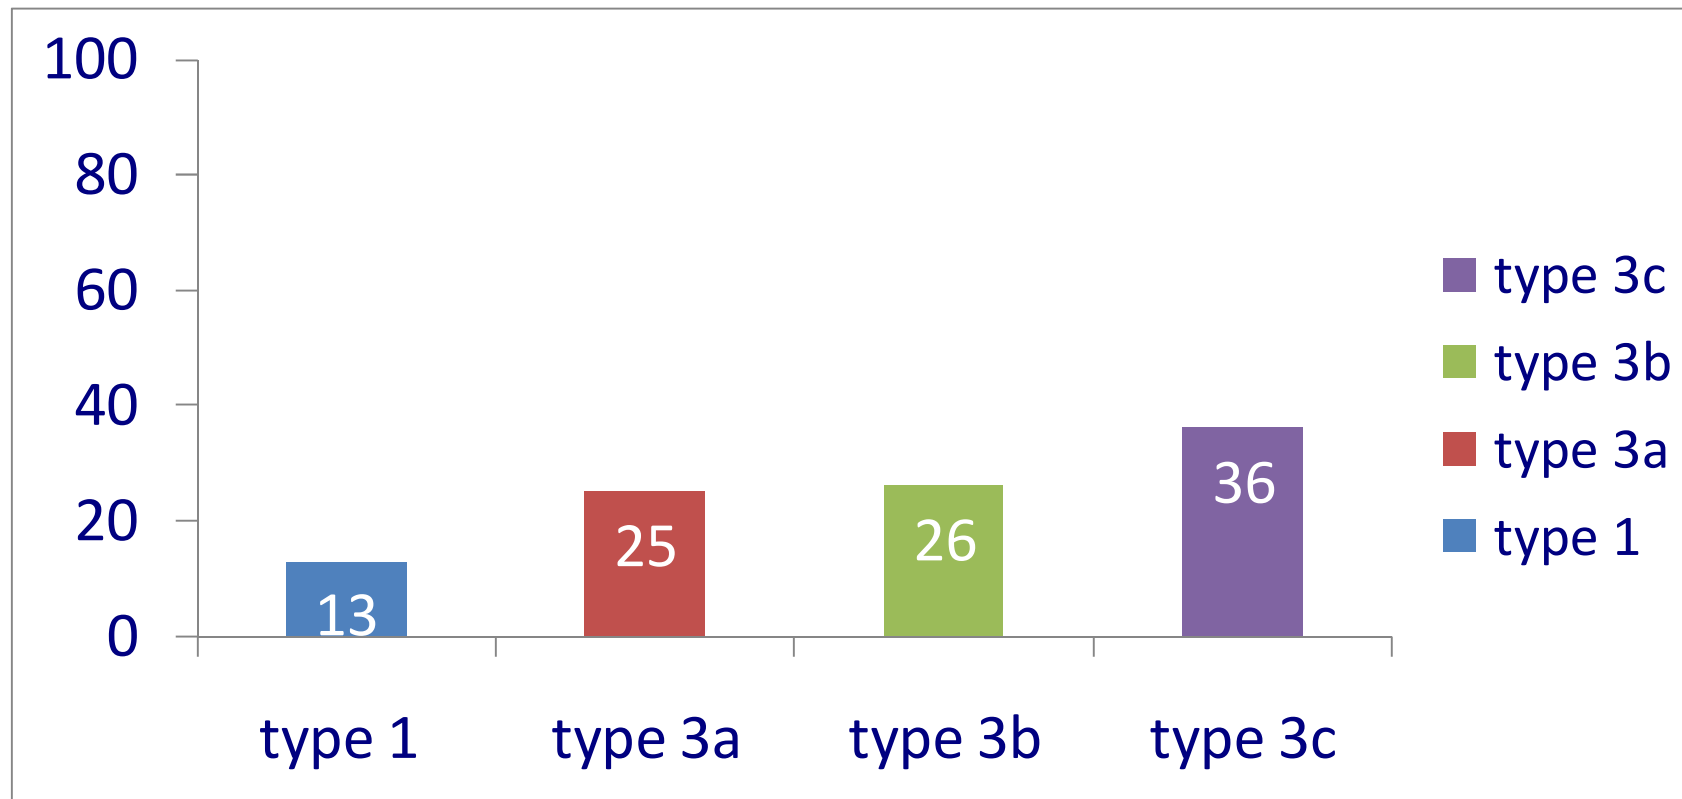

Supplement: MOESM4 [file 9738018]

Figure 5

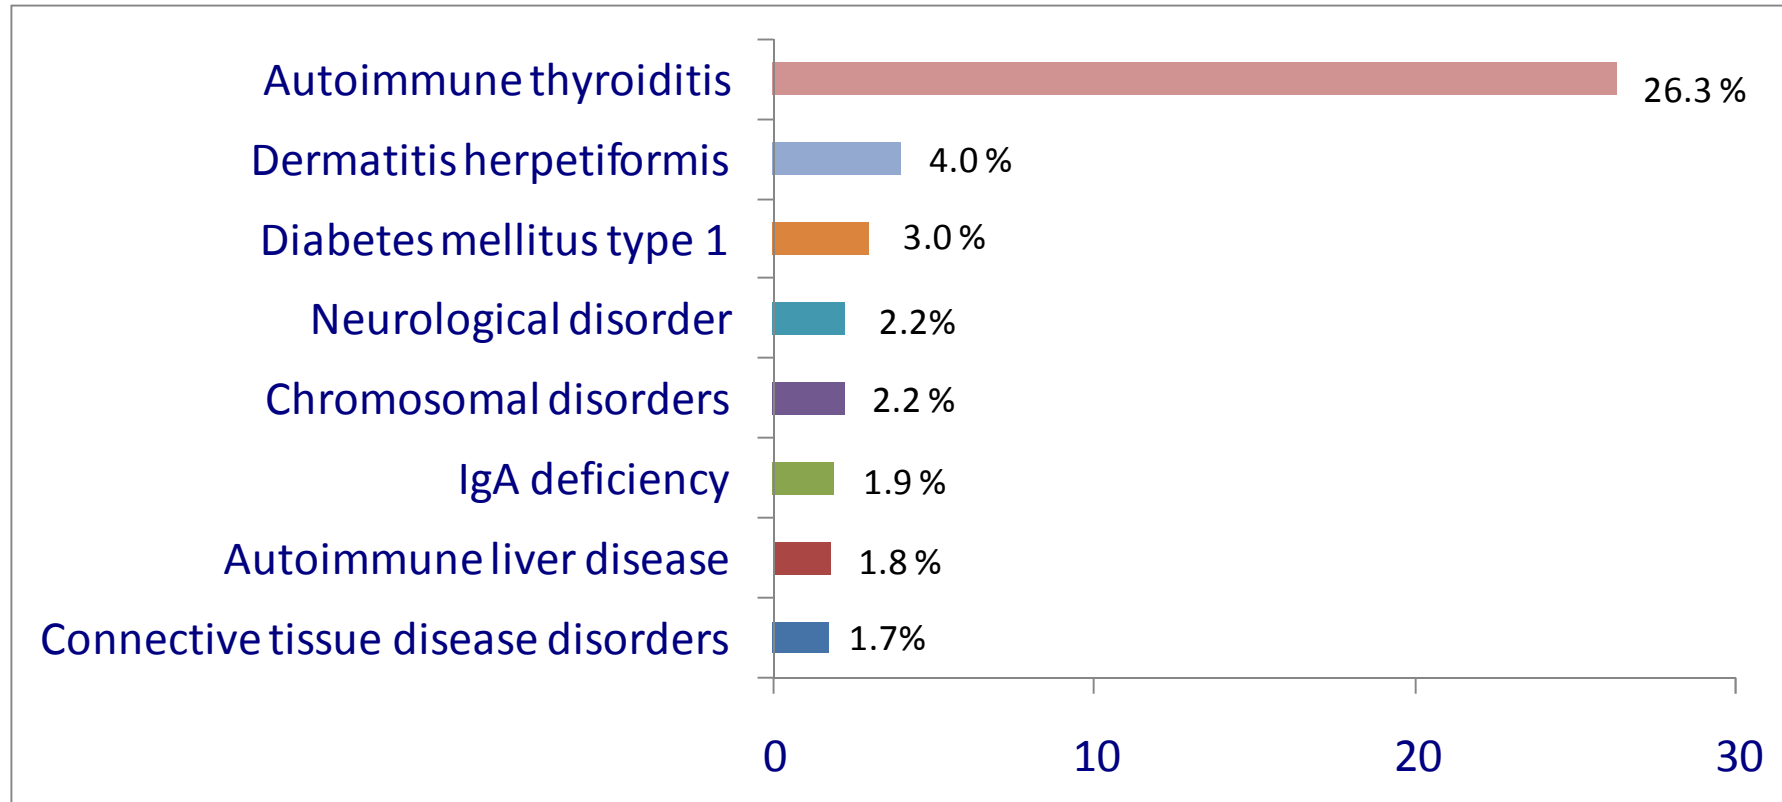

Supplement: MOESM5 [file 9738018]
